# Supplementary material for: Two Growing-Season Warming Partly Promoted Growth but Decreased Reproduction and Ornamental Value of Impatiens oxyanthera
Source: MDPI journal article supplement (doi:10.3390/plants13040511), 2024-02-12
Supplement: s1 [file s1]

| Constraint hierarchy $C$ | Weight value $W$ | Consistency check                                               | Standard hierarchy $P$ | Weight value $W$ | Consistency check       | Weight of layer $P$ contributed to $A$ |
|--------------------------|------------------|-----------------------------------------------------------------|------------------------|------------------|-------------------------|----------------------------------------|
| $C1$                     | 0.396            | $\lambda_{max} = 7.100$<br>$CI = 0.017$<br>$CR = 0.013 < 0.100$ | $P1$                   | 0.476            | $\lambda_{max} = 4.060$ | 0.188                                  |
|                          |                  |                                                                 | $P2$                   | 0.268            | $CI = 0.020$            | 0.106                                  |
|                          |                  |                                                                 | $P3$                   | 0.176            | $CR = 0.022 < 0.100$    | 0.07                                   |
|                          |                  |                                                                 | $P4$                   | 0.08             |                         | 0.032                                  |
| $C2$                     | 0.229            |                                                                 | $P5$                   | 0.431            | $\lambda_{max} = 5.140$ | 0.099                                  |
| $C3$                     | 0.141            |                                                                 | $P6$                   | 0.253            | $CI = 0.035$            | 0.058                                  |
|                          |                  |                                                                 | $P7$                   | 0.182            | $CR = 0.031 < 0.100$    | 0.042                                  |
|                          |                  |                                                                 | $P8$                   | 0.09             |                         | 0.021                                  |
|                          |                  |                                                                 | $P9$                   | 0.044            |                         | 0.01                                   |
| $C4$                     | 0.108            |                                                                 | $P10$                  |                  |                         | 0.181                                  |
| $C5$                     | 0.057            |                                                                 | $P11$                  |                  |                         | 0.096                                  |
| $C6$                     | 0.042            |                                                                 | $P12$                  |                  | $\lambda_{max} = 3.009$ | 0.07                                   |
|                          |                  |                                                                 | $P13$                  | 0.539            | $CI = 0.005$            | 0.015                                  |
| $C7$                     | 0.027            |                                                                 | $P14$                  | 0.297            | $CR = 0.009 < 0.100$    | 0.008                                  |
|                          |                  |                                                                 | $P15$                  | 0.164            |                         | 0.004                                  |
