# Supplementary material for: Two Growing-Season Warming Partly Promoted Growth but Decreased Reproduction and Ornamental Value of Impatiens oxyanthera
Source: MDPI journal article supplement (doi:10.3390/plants13040511), 2024-02-12
Supplement: s1 [file s1]

| Trait                                | 2017             |                  | 2018             |                  | W   | Y  | W × Y |
|--------------------------------------|------------------|------------------|------------------|------------------|-----|----|-------|
|                                      | Control          | Warming          | Control          | Warming          |     |    |       |
| Air daily mean temperature(°C)       | 20.966 ± 0.289 a | 22.859 ± 0.316 b | 20.308 ± 0.292 a | 22.684± 0.339 b  | *** | NS | NS    |
| Relative air humidity(%)             | 91.804 ± 0.715 a | 81.184 ± 0.856 b | 88.865± 0.605 a  | 81.619± 0.895 b  | *** | ** | *     |
| Soil temperature at -10 cm depth(°C) | 19.349 ± 0.239 a | 20.765 ± 0.246 b | 19.134 ± 0.247 a | 20.559 ± 0.274 b | *** | NS | NS    |
