# Supplementary material for: Two Growing-Season Warming Partly Promoted Growth but Decreased Reproduction and Ornamental Value of Impatiens oxyanthera
Source: MDPI journal article supplement (doi:10.3390/plants13040511), 2024-02-12
Supplement: s1 [file s1]

| $N$  | 1     | 2     | 3     | 4     | 5     | 6     | 7     | 8     | 9     | 10    |
|------|-------|-------|-------|-------|-------|-------|-------|-------|-------|-------|
| $RI$ | 0.000 | 0.000 | 0.580 | 0.900 | 1.120 | 1.240 | 1.320 | 1.410 | 1.450 | 1.490 |
