# Supplementary figures and images for: Two Growing-Season Warming Partly Promoted Growth but Decreased Reproduction and Ornamental Value of Impatiens oxyanthera
Source: MDPI journal article supplement (doi:10.3390/plants13040511), 2024-02-12

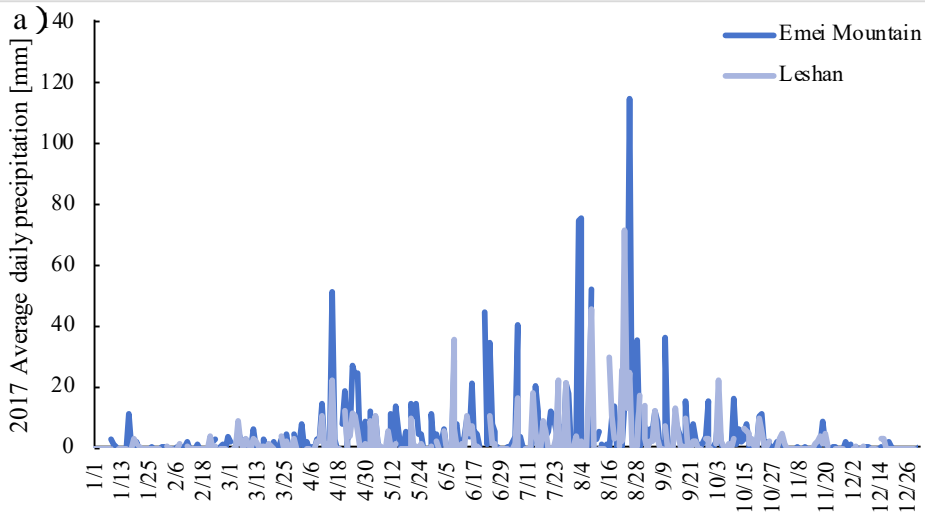

Supplement: s1 [file s1]

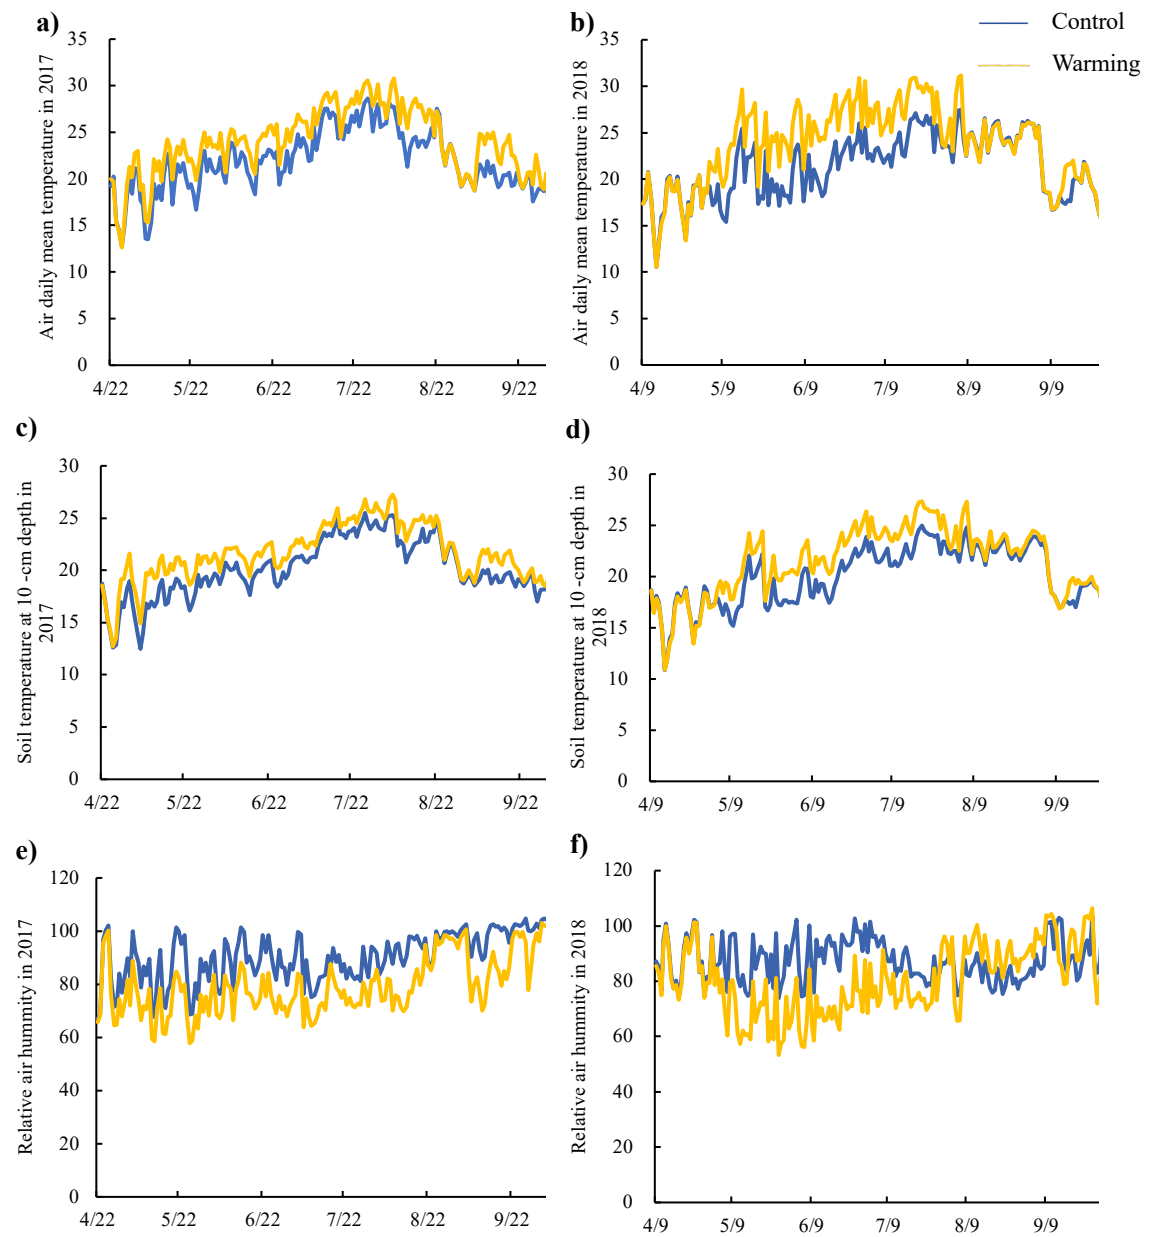

Supplement: s1 [file s1]

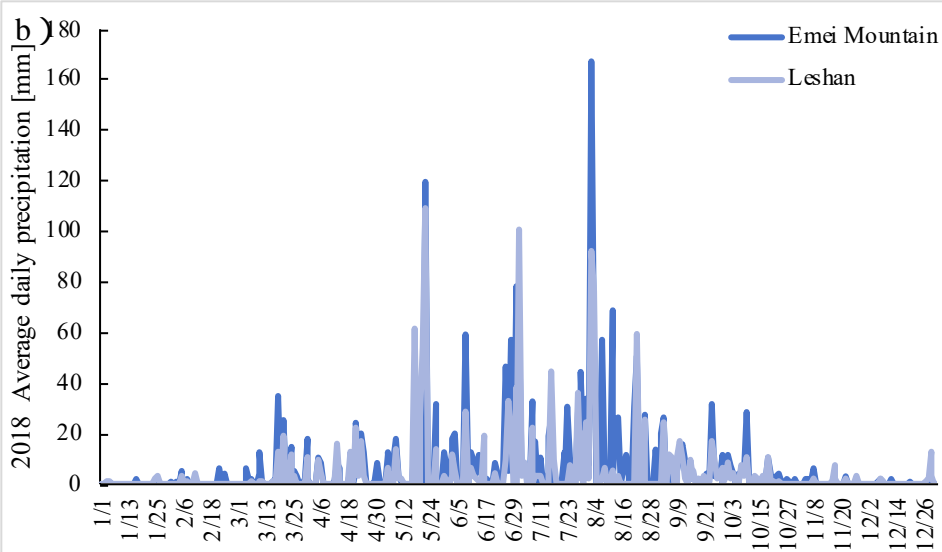

Supplement: s1 [file s1]
